# Supplementary material
Source: publisher site journal article supplement (http://kjim.org/upload/media/kjim-2020-474-suppl.pdf)
Supplement: Supplementary file 1 [file kjim-2020-474-suppl.pdf]

**Supplementary Table 1. Baseline characteristics**

| Characteristic              | Primary cancer organoid (n = 45) |
|-----------------------------|----------------------------------|
| Site of primary cancer site |                                  |
| Gastric cancer              | 15 (33.3)                        |
| Esophageal cancer           | 30 (66.7)                        |
| Age, yr                     | 64.9 ± 10.5                      |
| Male sex                    | 42 (93.3)                        |
| Diabetes                    | 9 (20.0)                         |
| Hypertension                | 10 (22.2)                        |
| Heart disease               | 1 (2.2)                          |
| Current smoker              | 23 (51.1)                        |
| Current drinker             | 26 (57.8)                        |

Values are presented as number (%) or mean ± SD.
